# Supplementary material for: Rational design of NiFe LDH@Ni3N nano/microsheet arrays as a bifunctional electrocatalyst for overall water splitting
Source: Royal Society of Chemistry journal article supplement (doi:10.1039/d0ta01966f), 2020-01-01
Supplement: d0ta01966f3.pdf [file d0ta01966f3.pdf]

## Supplementary Information

### **Rational design of NiFe LDH@Ni<sub>3</sub>N nano/microsheet arrays as bifunctional electrocatalyst for overall water splitting**

Boran Wang,<sup>a</sup> Shihui Jiao,<sup>a</sup> Zisheng Wang,<sup>a</sup> Mengjie Lu,<sup>b</sup> Duo Chen,<sup>b</sup> Yutang Kang,<sup>a</sup>

Guangsheng Pang<sup>\*a</sup> and Shouhua Feng<sup>a</sup>

<sup>a</sup> *The State Key Laboratory of Inorganic Synthesis and Preparative Chemistry, College of Chemistry, Jilin University, Changchun 130012, P. R. China.*

<sup>b</sup> *Sino-Russian International Joint Laboratory for Clean Energy and Energy Conversion Technology, College of Physics, Jilin University, Changchun 130012, P. R. China.*

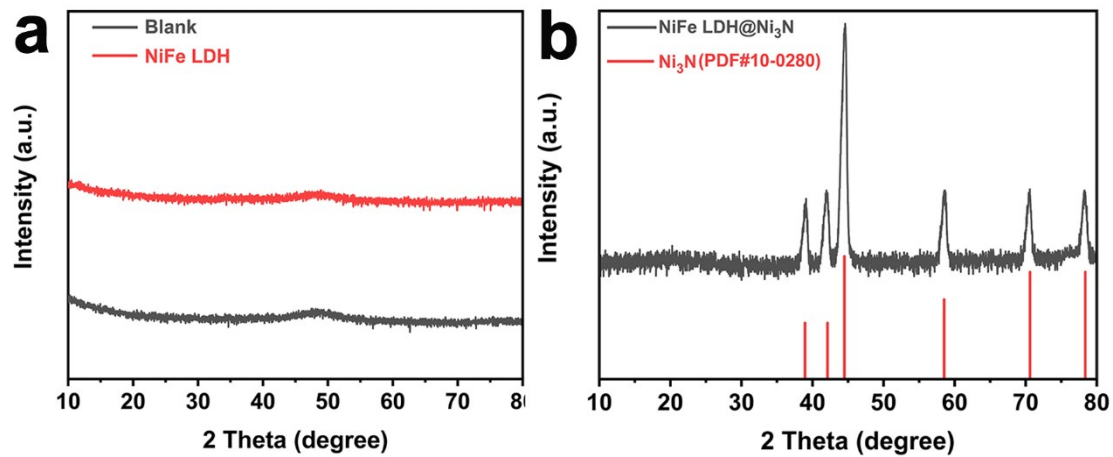

**Figure S1.** XRD patterns of (a) the NiFe LDH powder and blank substrate and (b) the NiFe LDH@Ni<sub>3</sub>N powder.

To eliminate the effect of Ni foam, we peeled the NiFe LDH and NiFe LDH@Ni<sub>3</sub>N from the NiFe LDH/NF and NiFe LDH@Ni<sub>3</sub>N/NF, respectively. There are no observable peaks in the XRD pattern of the NiFe LDH powder. The XRD pattern of the NiFe LDH@Ni<sub>3</sub>N powder peeled from Ni foam verifies the Ni<sub>3</sub>N phase. No observable diffraction peaks of NiFe LDH can be found from the corresponding XRD pattern.

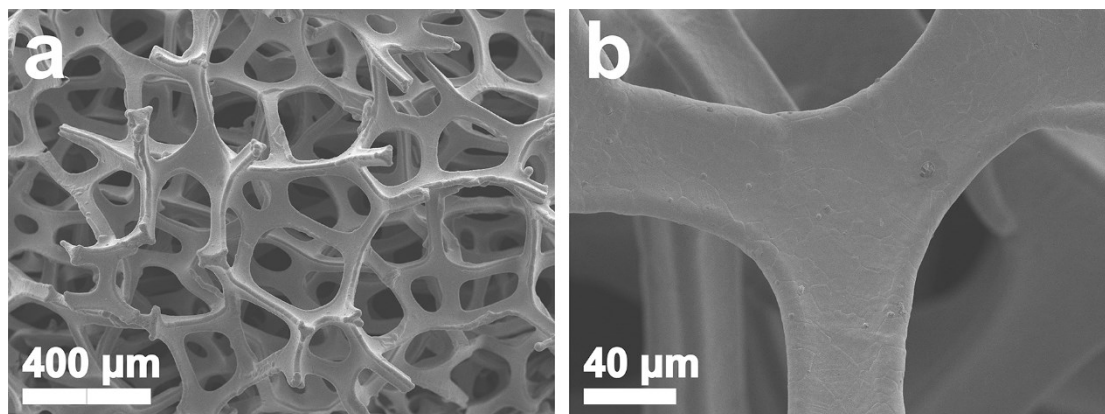

**Figure S2.** SEM images of the commercial Ni foam.

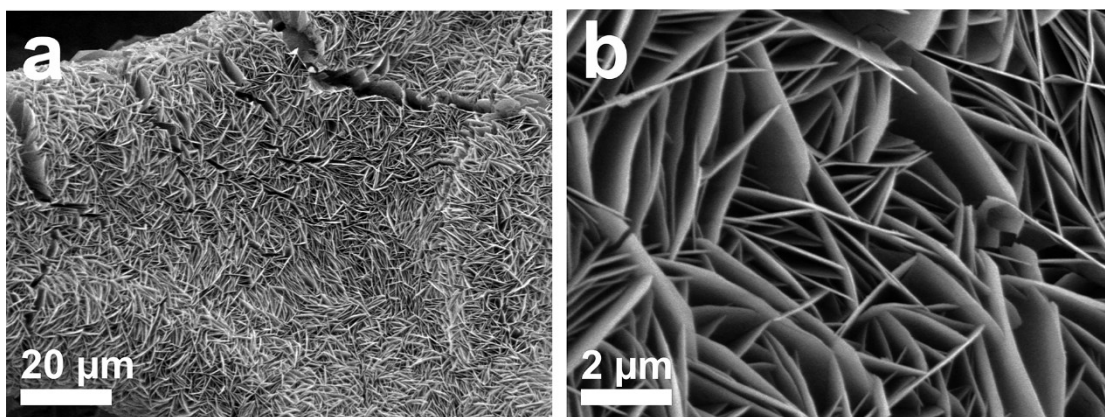

**Figure S3.** SEM images of the Ni(OH)<sub>2</sub>/NF.

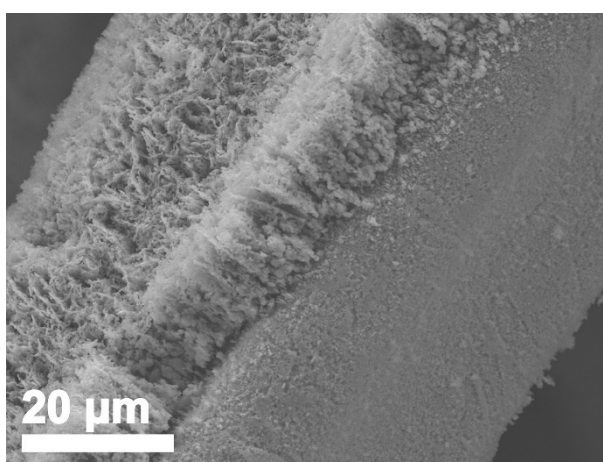

**Figure S4.** Cross-section SEM image of the NiFe LDH@Ni<sub>3</sub>N/NF.

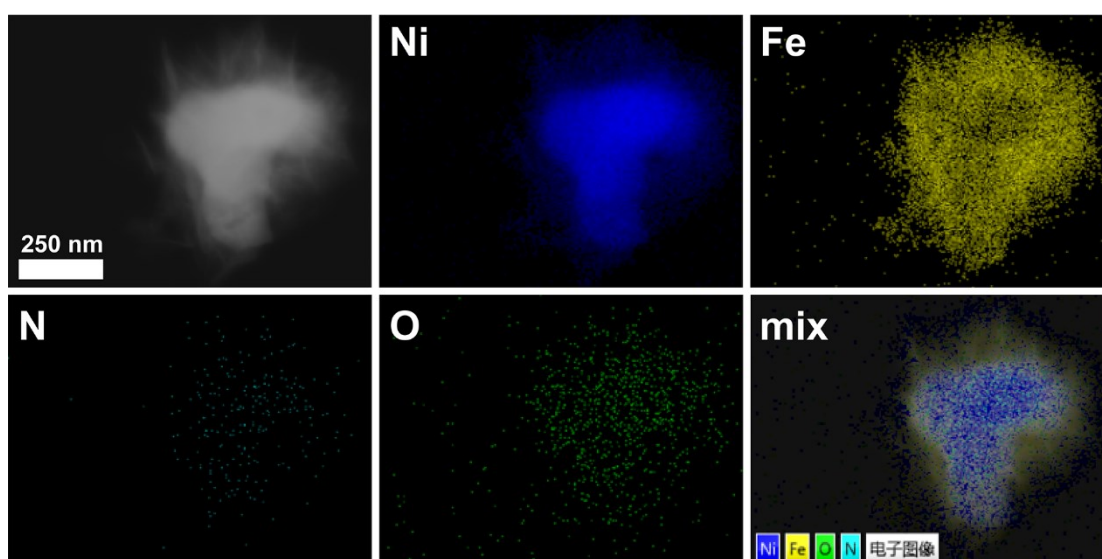

**Figure S5.** The scanning transmission electron microscopy image and the corresponding elemental mappings of Ni, Fe, N and O in the NiFe LDH@Ni<sub>3</sub>N.

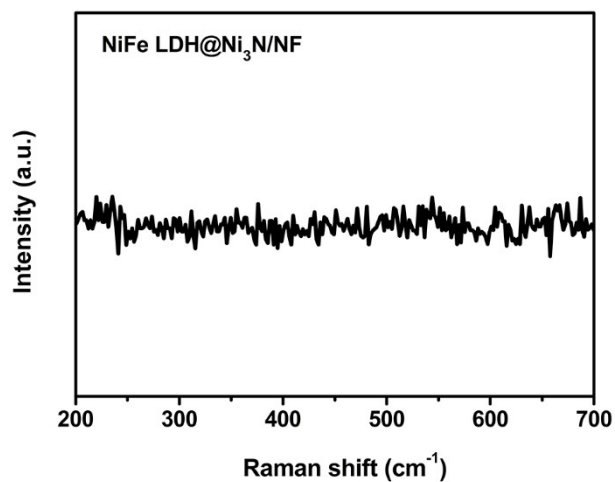

Figure S6. Raman spectrum of the NiFe LDH@Ni<sub>3</sub>N/NF.

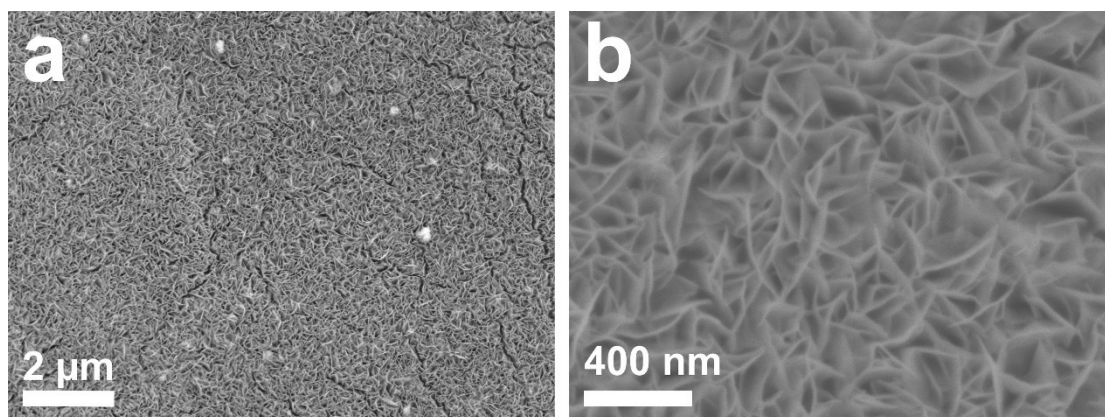

Figure S7. SEM images of the NiFe LDH/NF.

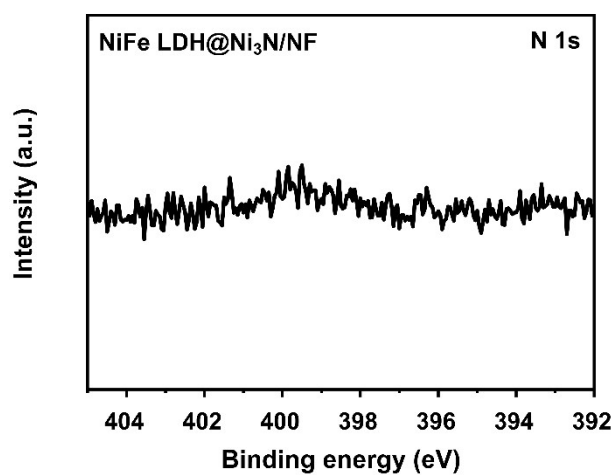

Figure S8. High-resolution XPS spectrum of N 1s for the NiFe LDH@Ni<sub>3</sub>N/NF.

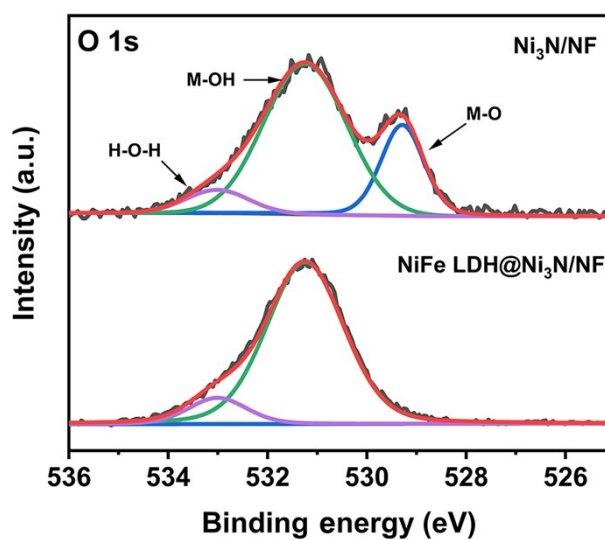

**Figure S9.** High-resolution XPS spectra of O 1s for the Ni<sub>3</sub>N/NF and NiFe LDH@Ni<sub>3</sub>N/NF.

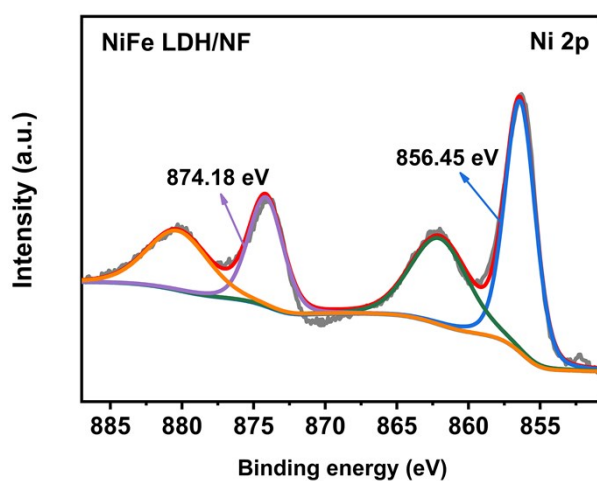

**Figure S10.** High-resolution XPS spectrum of Ni 2p for the NiFe LDH/NF.

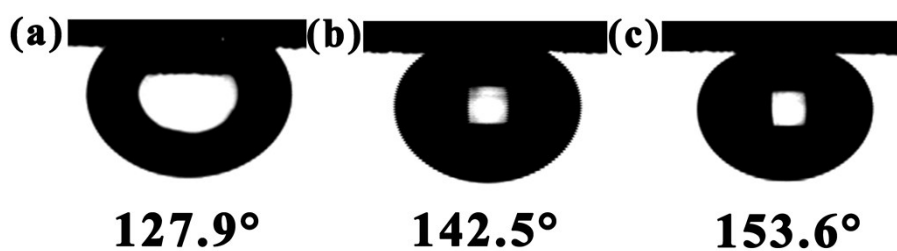

**Figure S11.** Air bubble contact angles under electrolyte at the (a) blank NF; (b) Ni<sub>3</sub>N/NF and (c) NiFe LDH@Ni<sub>3</sub>N/NF.

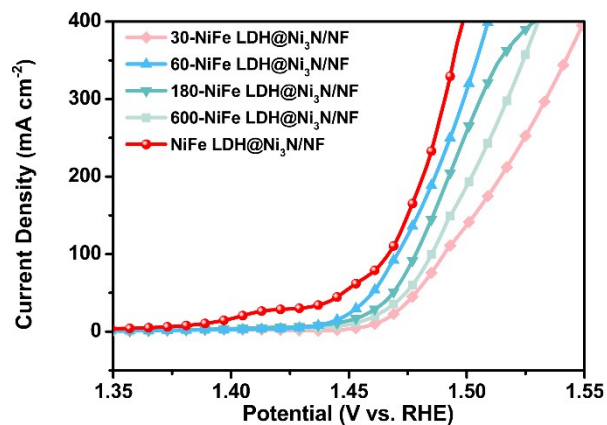

**Figure S12.** OER polarization curves of the 30-NiFe LDH@Ni<sub>3</sub>N/NF, 60-NiFe LDH@Ni<sub>3</sub>N/NF, 180-NiFe LDH@Ni<sub>3</sub>N/NF, 600-NiFe LDH@Ni<sub>3</sub>N/NF, and NiFe LDH@Ni<sub>3</sub>N/NF electrode.

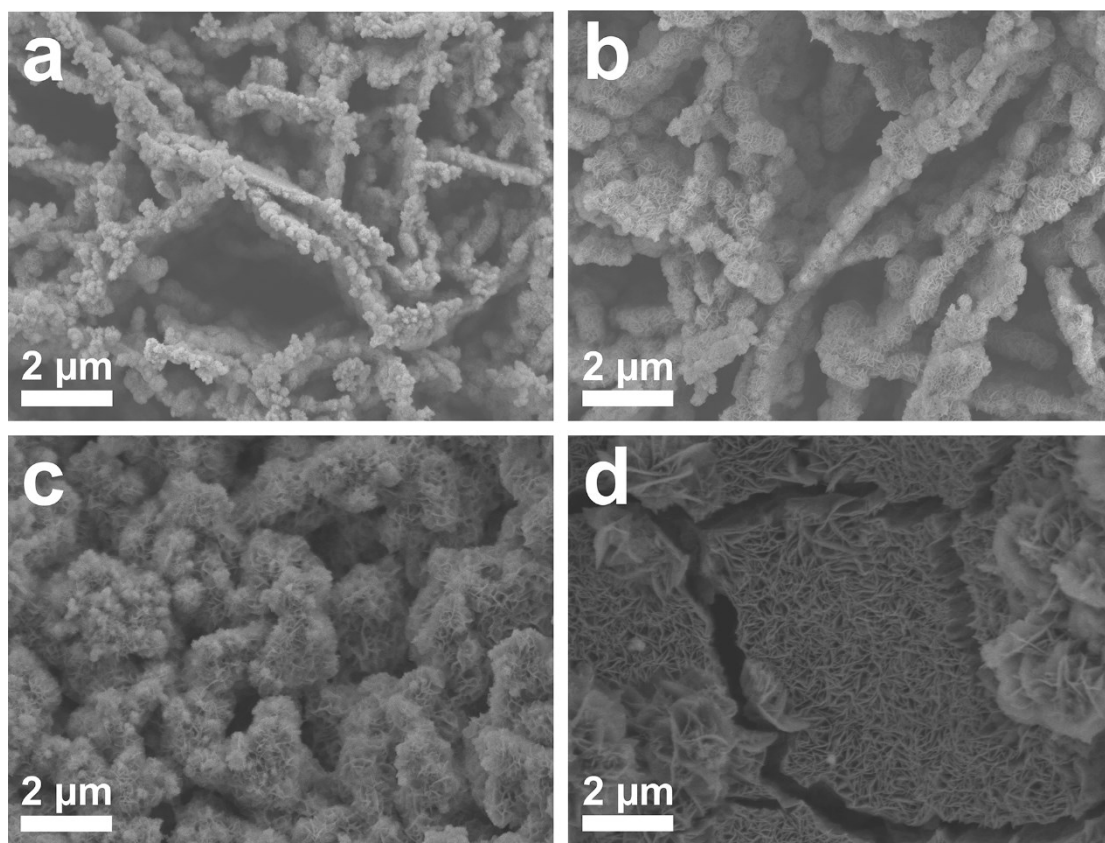

**Figure S13.** SEM images of (a) 30-NiFe LDH@Ni<sub>3</sub>N/NF; (b) 60-NiFe LDH@Ni<sub>3</sub>N/NF; (c) 180-NiFe LDH@Ni<sub>3</sub>N/NF and (d) 600-NiFe LDH@Ni<sub>3</sub>N/NF.

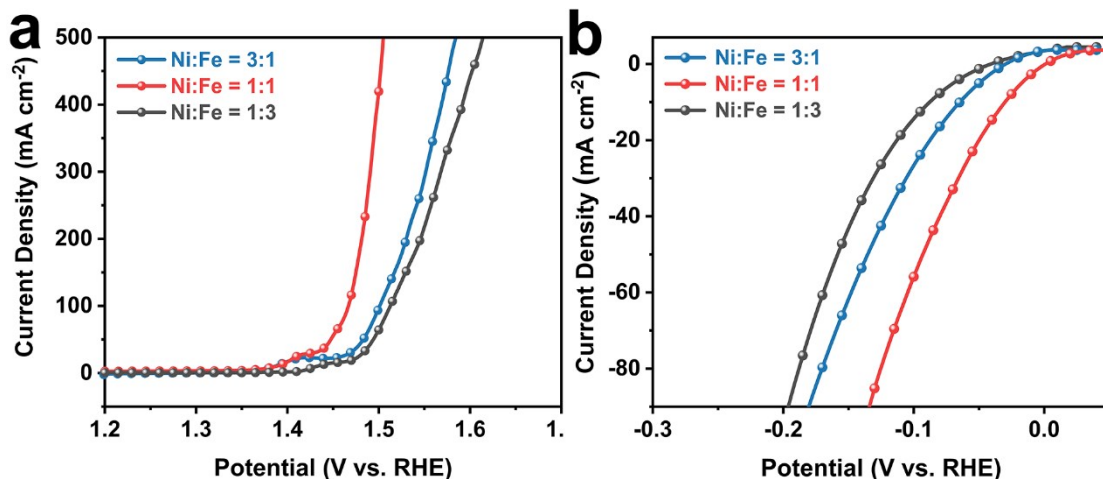

**Figure S14.** (a) OER and (b) HER polarization curves of the NiFe LDH@Ni<sub>3</sub>N/NF catalysts synthesized with different initial Ni/Fe ratio.

To optimize the composition of the electrodeposited NiFe LDH nanosheets, we have used electrolyte with different Ni/Fe precursor ( $\text{Fe}(\text{NO}_3)_3 \cdot 9\text{H}_2\text{O}$  and  $\text{Ni}(\text{NO}_3)_2 \cdot 6\text{H}_2\text{O}$ ) ratio (e.g., 7.5 mM of  $\text{Fe}^{3+}$  and 22.5 mM of  $\text{Ni}^{2+}$ ; 22.5 mM of  $\text{Fe}^{3+}$  and 7.5 mM of  $\text{Ni}^{2+}$ ; 15 mM of  $\text{Fe}^{3+}$  and 15 mM of  $\text{Ni}^{2+}$ ).

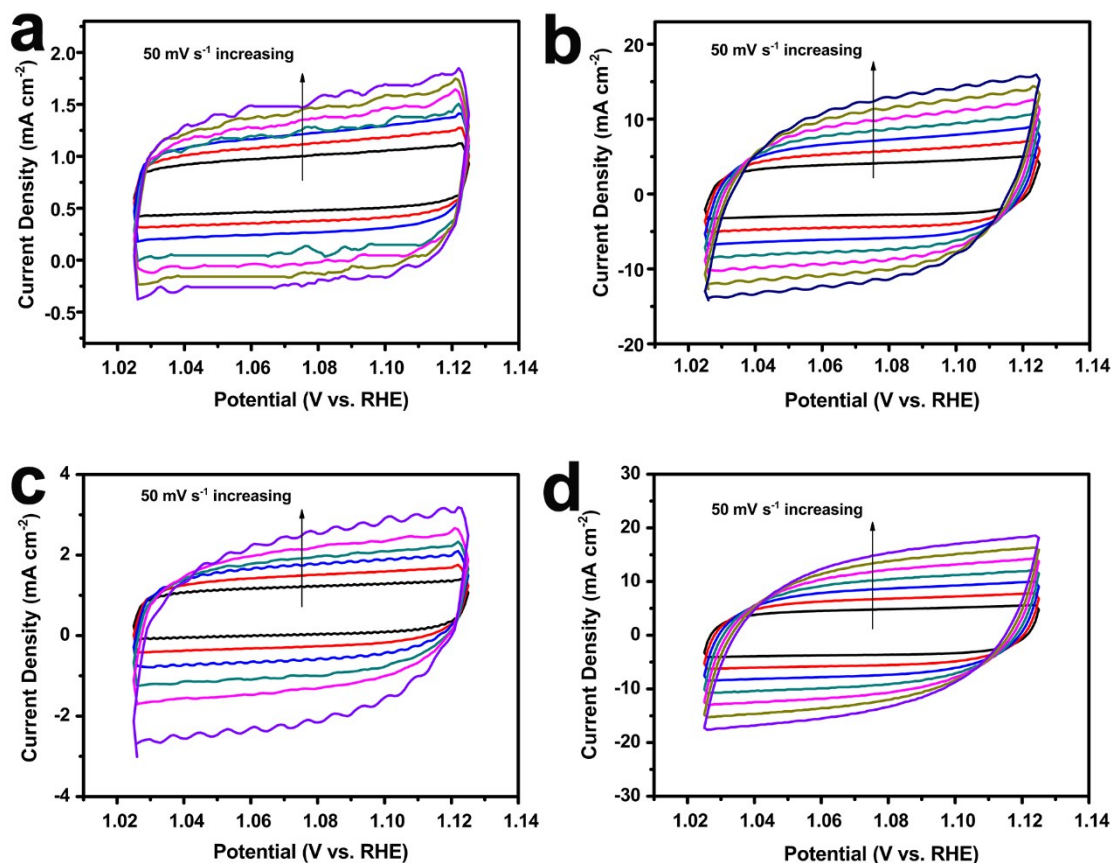

**Figure S15.** CV curves of the (a) blank NF; (b) Ni<sub>3</sub>N/NF; (c) NiFe LDH/NF and (d) NiFe LDH@Ni<sub>3</sub>N/NF measured at different scan rates.

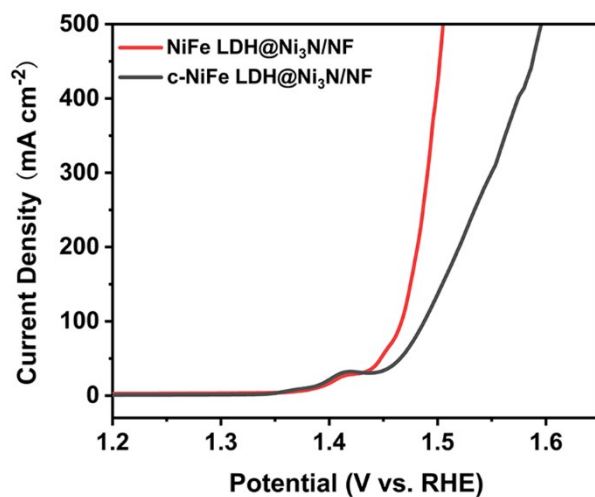

**Figure S16.** OER polarization curves of the NiFe LDH@Ni<sub>3</sub>N/NF and the annealing sample.

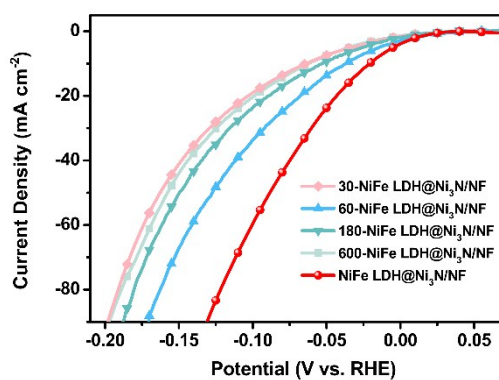

**Figure S17.** HER polarization curves of the 30-NiFe LDH@Ni<sub>3</sub>N/NF, 60-NiFe LDH@Ni<sub>3</sub>N/NF, 180-NiFe LDH@Ni<sub>3</sub>N/NF, 600-NiFe LDH@Ni<sub>3</sub>N/NF, and NiFe LDH@Ni<sub>3</sub>N/NF electrode.



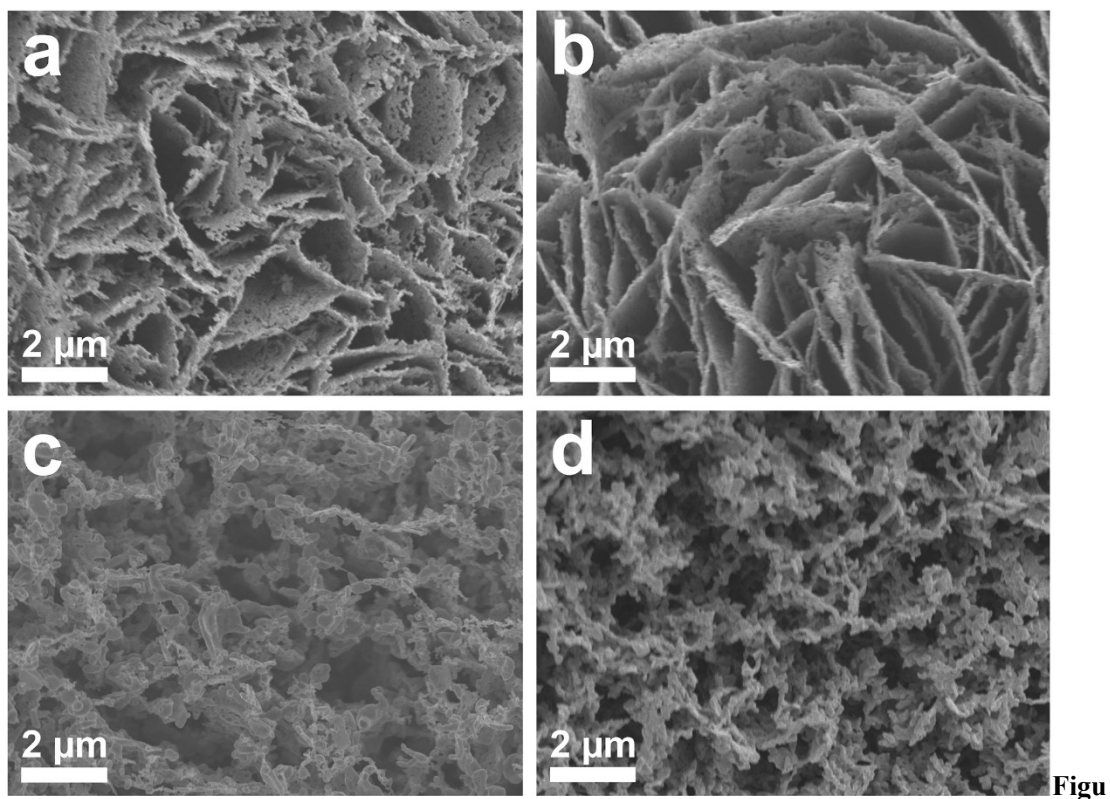

**Figure S18.** SEM images of the Ni<sub>3</sub>N/NF prepared under different nitridation treating conditions (a) 340 °C for 2h; (b) 380 °C for 1h; (c) 380 °C for 3h and (d) 420 °C for 2h.

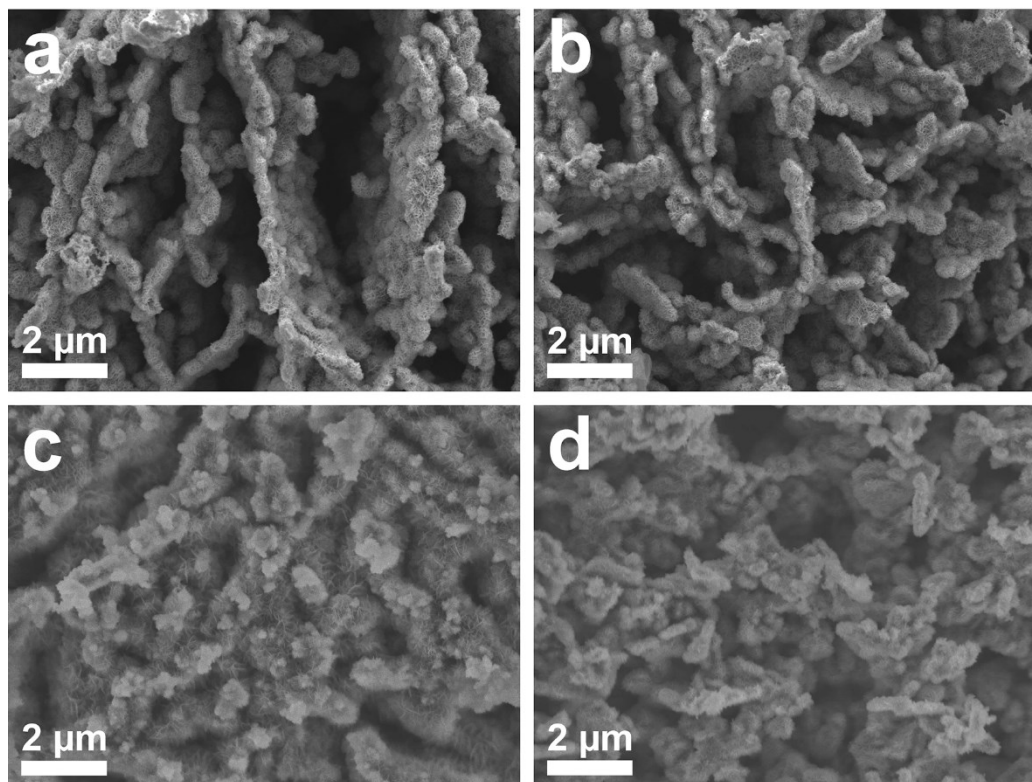

**Figure S19.** SEM images of the NiFe LDH@Ni<sub>3</sub>N/NF synthesized with different Ni<sub>3</sub>N/NF (a) 340 °C for 2h; (b) 380 °C for 1h; (c) 380 °C for 3h and (d) 420 °C for 2h.

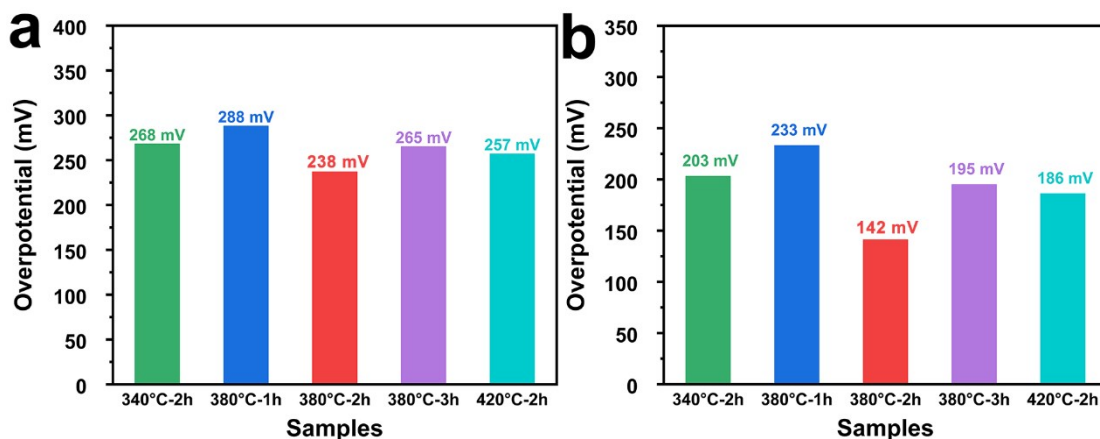

**Figure S20.** Comparison of overpotentials at a current density of  $100 \text{ mA cm}^{-2}$  for (a) OER and (b) HER of the NiFe LDH@Ni<sub>3</sub>N/NF catalysts synthesized with different Ni<sub>3</sub>N/NF.

To optimize the preparation conditions of Ni<sub>3</sub>N/NF, we have further changed the nitridation temperature and time (e.g., 340 °C for 2h, 380 °C for 1h, 380 °C for 3h, and 420 °C for 2h).

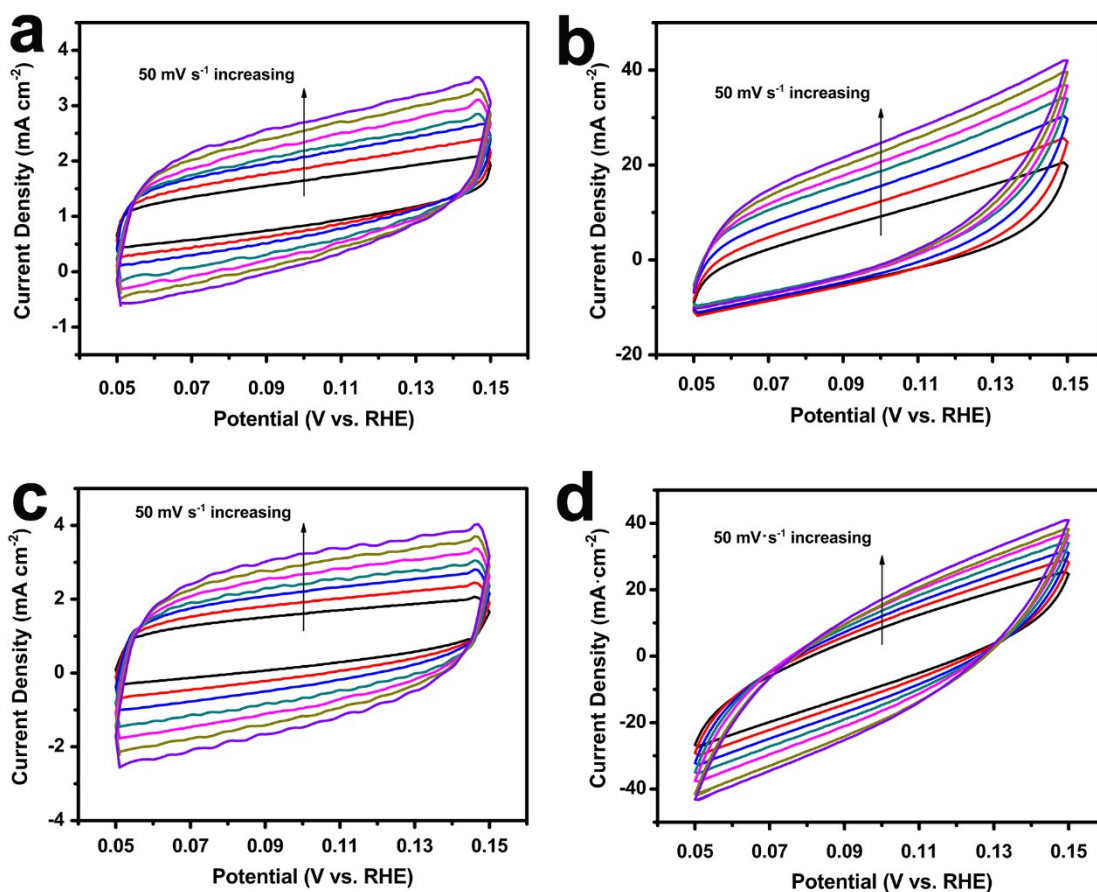

**Figure S21.** CV curves of the (a) blank NF; (b) Ni<sub>3</sub>N/NF; (c) NiFe LDH/NF and (d) NiFe LDH@Ni<sub>3</sub>N/NF measured at different scan rates.

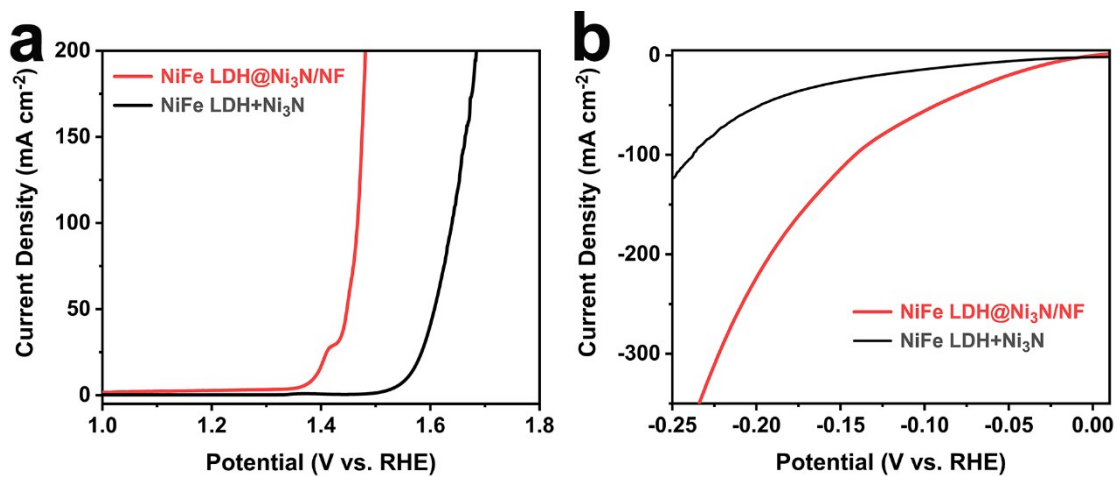

**Figure S22.** (a) OER and (b) HER polarization curves of the NiFe LDH@Ni<sub>3</sub>N/NF electrode compared to the physical mixture of NiFe LDH and Ni<sub>3</sub>N casted on the Ni foam.

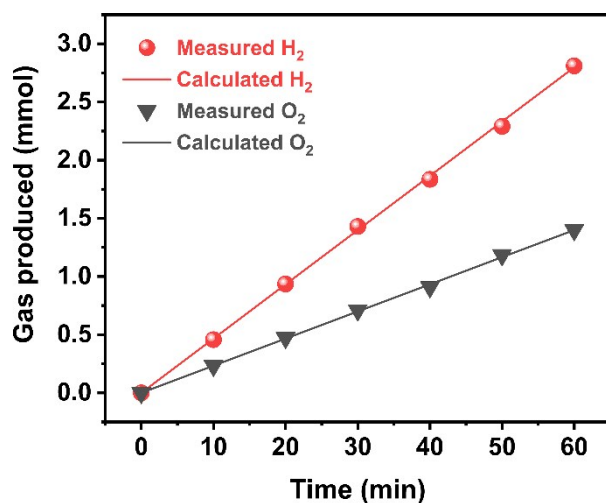

**Figure S23.** Experimental and theoretical amounts of H<sub>2</sub> and O<sub>2</sub> production by the NiFe LDH@Ni<sub>3</sub>N/NF//NiFe LDH@Ni<sub>3</sub>N/NF electrolyzer for overall water splitting at 500 mA cm<sup>-2</sup>.

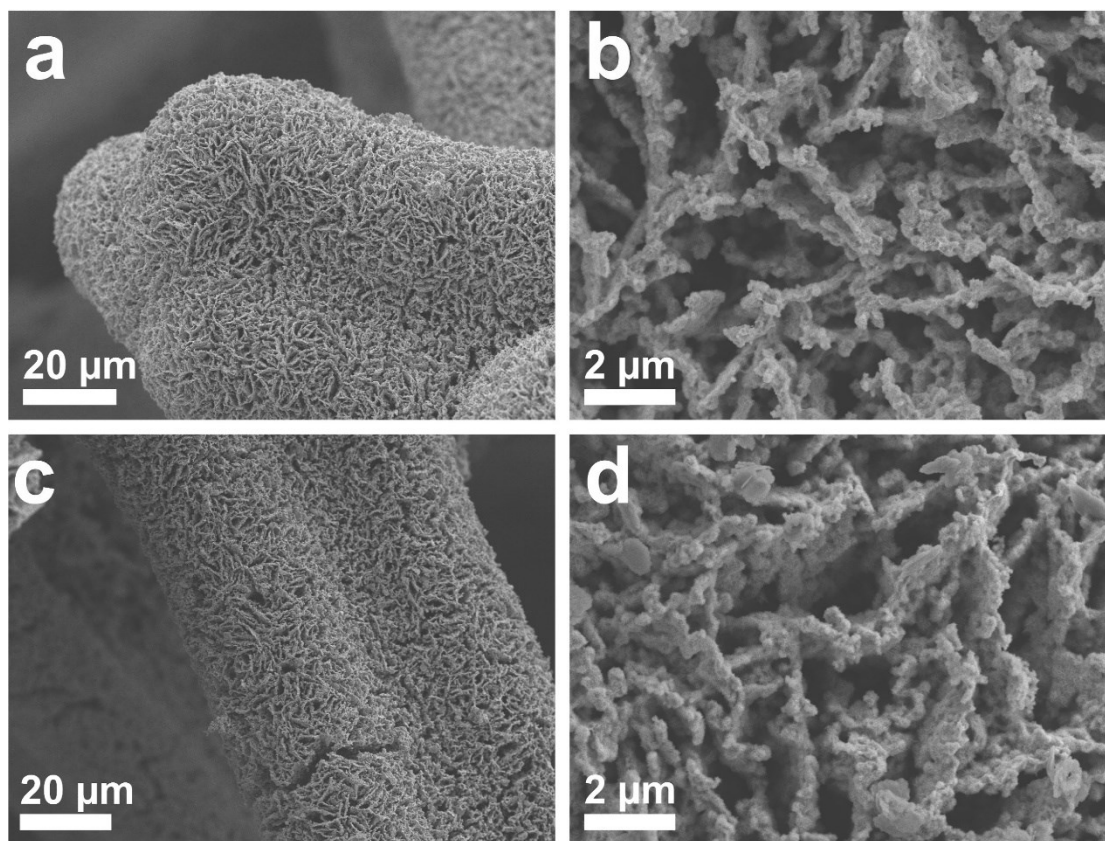

**Figure S24.** SEM images of the NiFe LDH@Ni<sub>3</sub>N/NF after (a-b) OER and (c-d) HER stability tests.

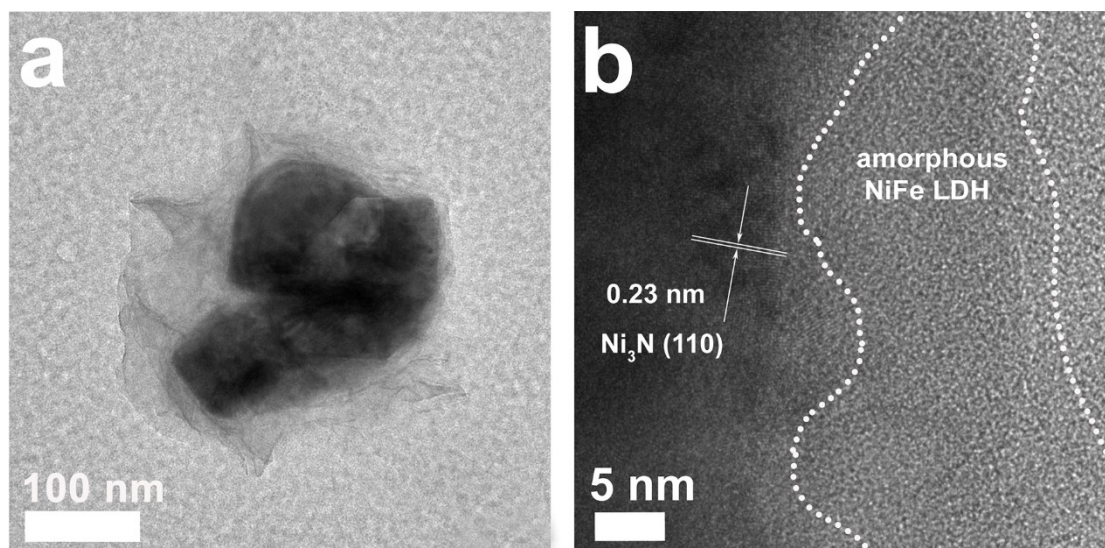

**Figure S25.** (a) TEM and (b) HRTEM images of the NiFe LDH@Ni<sub>3</sub>N/NF after OER stability test.

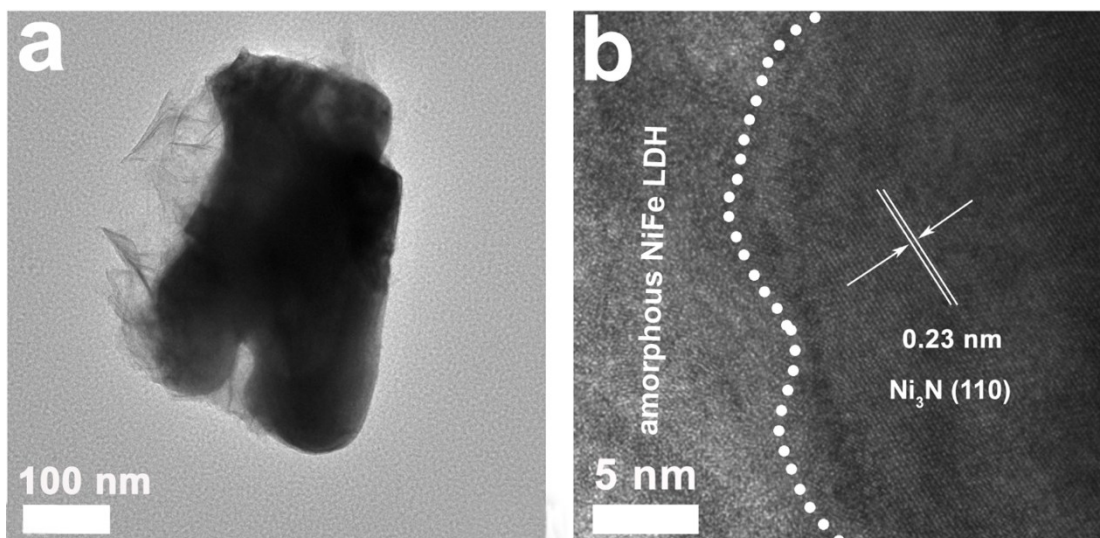

**Figure S26.** (a) TEM and (b) HRTEM images of the NiFe LDH@Ni<sub>3</sub>N/NF after HER stability test.

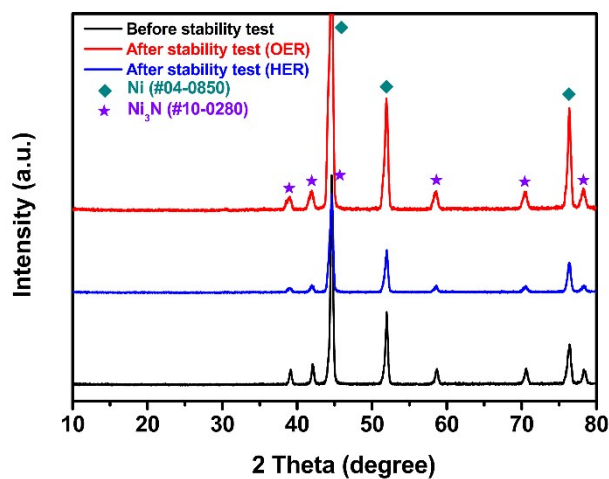

**Figure S27.** XRD patterns of the NiFe LDH@Ni<sub>3</sub>N/NF before and after stability tests.

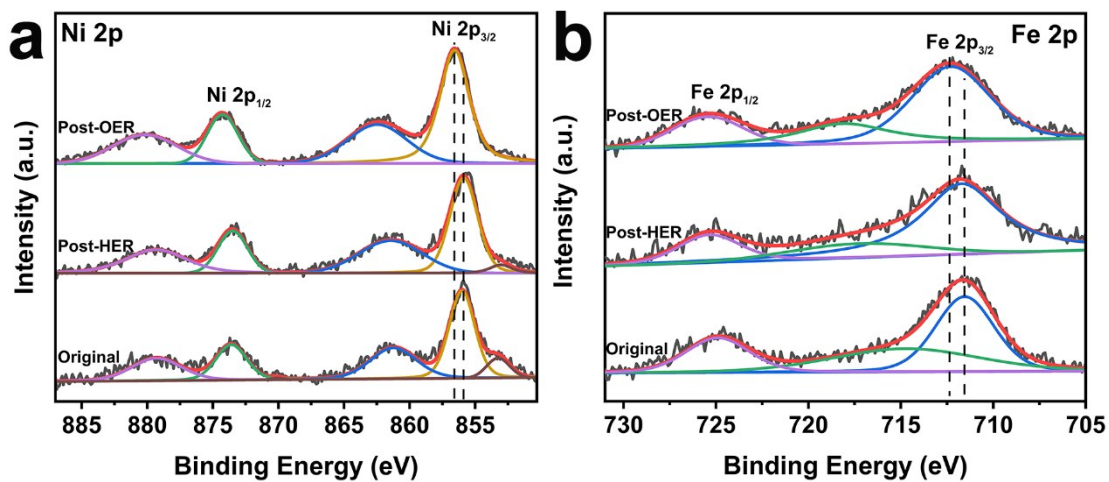

**Figure S28.** High-resolution XPS spectra of (a) Ni 2p and (b) Fe 2p for the NiFe LDH@Ni<sub>3</sub>N/NF before and after stability tests.

**Table S1.** The mass loadings of different NiFe LDH@Ni<sub>3</sub>N with different electrodeposition times on the Ni foam and the exact mass ratio of NiFe LDH to Ni<sub>3</sub>N.

| <b>Mass loadings<br/>Samples</b>  | <b>Ni<sub>3</sub>N<br/>(mg cm<sup>-2</sup>)</b> | <b>NiFe LDH<br/>(mg cm<sup>-2</sup>)</b> | <b>total<br/>(mg cm<sup>-2</sup>)</b> | <b>mass ratio<br/>(Ni<sub>3</sub>N/NiFe LDH)</b> |
|-----------------------------------|-------------------------------------------------|------------------------------------------|---------------------------------------|--------------------------------------------------|
| Ni <sub>3</sub> N/NF              | 3.21                                            | -                                        | 3.21                                  | -                                                |
| 30-NiFe LDH@Ni <sub>3</sub> N/NF  | 3.21                                            | 0.31                                     | 3.52                                  | 10.35:1                                          |
| 60-NiFe LDH@Ni <sub>3</sub> N/NF  | 3.21                                            | 0.37                                     | 3.58                                  | 8.68:1                                           |
| NiFe LDH@Ni <sub>3</sub> N/NF     | 3.21                                            | 0.82                                     | 4.03                                  | 3.91:1                                           |
| 180-NiFe LDH@Ni <sub>3</sub> N/NF | 3.21                                            | 1.59                                     | 4.80                                  | 2.02:1                                           |
| 600-NiFe LDH@Ni <sub>3</sub> N/NF | 3.21                                            | 4.05                                     | 7.26                                  | 0.79:1                                           |

**Table S2.** OER performances of Ni and Fe based electrocatalysts in 1 M KOH electrolyte: this work vs. literatures.

| Reference<br>s   | Catalyst                                                                             | j (mA cm <sup>-2</sup> ) | $\eta$ (mV)              | Stability<br>Test                                | Faradaic<br>efficiency |
|------------------|--------------------------------------------------------------------------------------|--------------------------|--------------------------|--------------------------------------------------|------------------------|
| <b>This work</b> | <b>NiFe LDH@Ni<sub>3</sub>N/NF</b>                                                   | <b>100</b><br><b>500</b> | <b>238</b><br><b>275</b> | <b>100 h at 500</b><br><b>mA cm<sup>-2</sup></b> | <b>100%</b>            |
| 14               | NFN-MOF/NF                                                                           | 10<br>250<br>500         | 240<br>335<br>360        | 30 h at 250 and<br>500 mA cm <sup>-2</sup>       | 100%                   |
| 30               | NiFe-LDH/MXene/NF                                                                    | 500                      | 300                      | 70 h at 100 mA<br>cm <sup>-2</sup>               | 98%                    |
| 55               | CoNi/CoFe <sub>2</sub> O <sub>4</sub> /NF                                            | 10<br>100<br>500         | 230<br>290<br>330        | 48 h at 10 and<br>100 mA cm <sup>-2</sup>        | 99%                    |
| 56               | Sn-Ni <sub>3</sub> S <sub>2</sub> /NF                                                | 100<br>500               | 267<br>440               | 60 h at 100 and<br>500 mA cm <sup>-2</sup>       | 100%                   |
| 57               | Fe-CoP/NF                                                                            | 500                      | 295                      | 30 h at 500 mA<br>cm <sup>-2</sup>               | 100%                   |
| 58               | Ni@NiFe LDH                                                                          | 100<br>300<br>500        | 269<br>315<br>349        | 24 h at 10 mA<br>cm <sup>-2</sup>                | 100%                   |
| 59               | P-Co-Ni-S/NF                                                                         | 100<br>500               | 292<br>449*              | 16 h at 10 mA<br>cm <sup>-2</sup>                | NA                     |
| 60               | NF-Ni <sub>3</sub> S <sub>2</sub> /MnO <sub>2</sub>                                  | 10<br>100<br>500         | 260<br>348<br>431*       | 40 h at 100 mA<br>cm <sup>-2</sup>               | NA                     |
| 61               | NiFe/NiCo <sub>2</sub> O <sub>4</sub> /NF                                            | 10<br>500                | 240*<br>321*             | 11 h at 10 and<br>50 mA cm <sup>-2</sup>         | 99.8%                  |
| 62               | Ni <sub>x</sub> Co <sub>3-x</sub> S <sub>4</sub> /Ni <sub>3</sub> S <sub>2</sub> /NF | 100<br>500               | 320<br>475               | 30 h at 10 mA<br>cm <sup>-2</sup>                | 100%                   |
| 63               | MFN-MOFs/NF                                                                          | 50<br>500                | 235<br>294               | NA                                               | 100%                   |
| 64               | Ni <sub>0.3</sub> Co <sub>0.7</sub> -9AC-AD/NF                                       | 100                      | 350                      | 30 h at 70 mA<br>cm <sup>-2*</sup>               | NA                     |
| 65               | FeSe <sub>2</sub> -180 °C                                                            | 10                       | 330                      | 70 h at 37 mA<br>cm <sup>-2*</sup>               | 100%                   |

\* The value is calculated from the curves shown in the literatures.

**Table S3.** TOF for different samples at overpotential of 300 mV corresponding to OER.

| <b>Catalyst</b>                        | <b>TOF (s<sup>-1</sup>)</b> |
|----------------------------------------|-----------------------------|
| <b>Ni<sub>3</sub>N/NF</b>              | <b>0.010</b>                |
| <b>NiFe LDH/NF</b>                     | <b>0.189</b>                |
| <b>30-NiFe LDH@Ni<sub>3</sub>N/NF</b>  | <b>0.204</b>                |
| <b>60-NiFe LDH@Ni<sub>3</sub>N/NF</b>  | <b>0.560</b>                |
| <b>NiFe LDH@Ni<sub>3</sub>N/NF</b>     | <b>0.579</b>                |
| <b>180-NiFe LDH@Ni<sub>3</sub>N/NF</b> | <b>0.502</b>                |
| <b>600-NiFe LDH@Ni<sub>3</sub>N/NF</b> | <b>0.395</b>                |



**Table S4.** HER performances of Ni foam-based electrocatalysts in 1 M KOH electrolyte: this work vs. literatures.

| Reference<br>s   | Catalyst                                                                             | j (mA cm <sup>-2</sup> ) | $\eta$<br>(mV)           | Stability Test                                   | Faradaic<br>efficiency |
|------------------|--------------------------------------------------------------------------------------|--------------------------|--------------------------|--------------------------------------------------|------------------------|
| <b>This work</b> | <b>NiFe LDH@Ni<sub>3</sub>N/NF</b>                                                   | <b>100</b><br><b>500</b> | <b>142</b><br><b>265</b> | <b>100 h at 500 mA</b><br><b>cm<sup>-2</sup></b> | <b>100%</b>            |
| 14               | NFN-MOF/NF                                                                           | 10<br>250<br>500         | 87<br>256<br>293         | 30 h at 250 and<br>500 mA cm <sup>-2</sup>       | 100%                   |
| 30               | NiFe-LDH/MXene/NF                                                                    | 500                      | 205                      | 280 h at 10 mA cm <sup>-2</sup>                  | 98%                    |
| 55               | CoNi/CoFe <sub>2</sub> O <sub>4</sub> /NF                                            | 10<br>100                | 82<br>189                | 48 h at 10 and 100<br>mA cm <sup>-2</sup>        | 99%                    |
| 56               | Sn-Ni <sub>3</sub> S <sub>2</sub> /NF                                                | 100<br>300               | 171<br>279               | 60 h at 200 mA cm <sup>-2</sup>                  | 99.7%                  |
| 57               | Fe-CoP/NF                                                                            | 10                       | 78                       | 30 h at 10 mA cm <sup>-2</sup>                   | 100%                   |
| 58               | Ni@NiFe LDH                                                                          | 100                      | 233                      | 24 h at 10 mA cm <sup>-2</sup>                   | 100%                   |
| 59               | P-Co-Ni-S/NF                                                                         | 100<br>500               | 187<br>287*              | 16 h at 10 mA cm <sup>-2</sup>                   | NA                     |
| 60               | NF-Ni <sub>3</sub> S <sub>2</sub> /MnO <sub>2</sub>                                  | 10<br>100                | 102<br>197               | 48 h at 40 mA cm <sup>-2</sup>                   | NA                     |
| 61               | NiFe/NiCo <sub>2</sub> O <sub>4</sub> /NF                                            | 10<br>100                | 105<br>204*              | 10 h at 20 mA cm <sup>-2</sup>                   | NA                     |
| 62               | Ni <sub>x</sub> Co <sub>3-x</sub> S <sub>4</sub> /Ni <sub>3</sub> S <sub>2</sub> /NF | 100<br>500               | 258<br>432               | 50 h at 10 mA cm <sup>-2</sup>                   | 100%                   |
| 63               | MFN-MOFs/NF                                                                          | 10<br>500                | 79<br>234                | NA                                               | 100%                   |
| 64               | Ni <sub>0.3</sub> Co <sub>0.7</sub> -9AC-AD/NF                                       | 10<br>100                | 143<br>232               | 30 h at 4 mA cm <sup>-2*</sup>                   | NA                     |

\* The value is calculated from the curves shown in the literatures.

**Table S5.** TOF for different samples at overpotential of 100 mV corresponding to HER.

| <b>Catalyst</b>                   | <b>TOF (s<sup>-1</sup>)</b> |
|-----------------------------------|-----------------------------|
| Ni <sub>3</sub> N/NF              | 0.050                       |
| NiFe LDH/NF                       | 0.031                       |
| 30-NiFe LDH@Ni <sub>3</sub> N/NF  | 0.058                       |
| 60-NiFe LDH@Ni <sub>3</sub> N/NF  | 0.104                       |
| NiFe LDH@Ni <sub>3</sub> N/NF     | 0.157                       |
| 180-NiFe LDH@Ni <sub>3</sub> N/NF | 0.070                       |
| 600-NiFe LDH@Ni <sub>3</sub> N/NF | 0.062                       |

**Table S6.** Overall water splitting performances of Ni foam-based bifunctional electrocatalysts in 1 M KOH electrolyte: this work vs. literatures.

| References       | Catalyst                                                                             | j (mA cm <sup>-2</sup> ) | Potential (V) | Stability Test                           |
|------------------|--------------------------------------------------------------------------------------|--------------------------|---------------|------------------------------------------|
| <b>This work</b> | <b>NiFe LDH@Ni<sub>3</sub>N/NF</b>                                                   | <b>100</b>               | <b>1.63</b>   | <b>100 h at 500 mA cm<sup>-2</sup></b>   |
|                  |                                                                                      | <b>500</b>               | <b>1.80</b>   |                                          |
| 14               | NFN-MOF/NF                                                                           | 10                       | 1.56          | 30 h at 250 and 500 mA cm <sup>-2</sup>  |
|                  |                                                                                      | 250                      | 1.84          |                                          |
|                  |                                                                                      | 500                      | 1.96          |                                          |
| 30               | NiFe-LDH/MXene/NF                                                                    | 10                       | 1.51          | 200 h at 100 mA cm <sup>-2</sup>         |
|                  |                                                                                      | 500                      | 1.75          |                                          |
| 55               | CoNi/CoFe <sub>2</sub> O <sub>4</sub> /NF                                            | 10                       | 1.57          | 48 h at 10 and 100 mA cm <sup>-2</sup>   |
|                  |                                                                                      | 100                      | 1.75          |                                          |
| 56               | Sn-Ni <sub>3</sub> S <sub>2</sub> /NF                                                | 10                       | 1.46          | 45 h at 10 mA cm <sup>-2</sup>           |
|                  |                                                                                      | 100                      | 1.77*         |                                          |
|                  |                                                                                      | 500                      | 2.26          |                                          |
| 57               | Fe-CoP/NF                                                                            | 10                       | 1.49          | 50 h at 10 mA cm <sup>-2</sup>           |
|                  |                                                                                      | 100                      | 1.61*         |                                          |
| 58               | Ni@NiFe LDH                                                                          | 10                       | 1.53          | 24 h at 10 mA cm <sup>-2</sup>           |
|                  |                                                                                      | 100                      | 1.78          |                                          |
| 59               | P-Co-Ni-S/NF                                                                         | 10                       | 1.60          | 20 h at 10 mA cm <sup>-2</sup>           |
| 60               | NF-Ni <sub>3</sub> S <sub>2</sub> /MnO <sub>2</sub>                                  | 10                       | 1.52          | 48 h at 100 mA cm <sup>-2</sup>          |
|                  |                                                                                      | 100                      | 1.61*         |                                          |
| 61               | NiFe/NiCo <sub>2</sub> O <sub>4</sub> /NF                                            | 10                       | 1.67          | 10 h at 20 mA cm <sup>-2</sup>           |
|                  |                                                                                      | 100                      | 1.88*         |                                          |
| 62               | Ni <sub>x</sub> Co <sub>3-x</sub> S <sub>4</sub> /Ni <sub>3</sub> S <sub>2</sub> /NF | 10                       | 1.53          | 200 h at 10 and 100 mA cm <sup>-2</sup>  |
|                  |                                                                                      | 100                      | 1.80          |                                          |
| 63               | MFN-MOFs/NF                                                                          | 10                       | 1.50          | 100 h at 100 and 500 mA cm <sup>-2</sup> |
|                  |                                                                                      | 500                      | 1.80          |                                          |
| 64               | Ni <sub>0.3</sub> Co <sub>0.7</sub> -9AC-AD/NF                                       | 10                       | 1.56          | 30 h at 11 mA cm <sup>-2*</sup>          |
|                  |                                                                                      | 100                      | 1.72*         |                                          |

\* The value is calculated from the curves shown in the literatures.
